# Supplementary material for: Effect of Ketogenic Diet on Quality of Life in Adults with Chronic Disease: A Systematic Review of Randomized Controlled Trials
Source: MDPI journal article supplement (doi:10.3390/nu13124463), 2021-12-14
Supplement: s1 [file s1]

Table S1. Characteristics of included studies.

| First Author, Year       | Country                        | Study population & Type of chronic disease                                                                                                                                                                                                                                                                                                                                                 | Age (Range/Mean±SD)                             | %Male  | Duration              | Intervention: Features of KD                                                                                                                                                                        | Control                                                                                                                                                                                                                                             | Iso-caloric diets (arms)                                                 | Co-intervention | Assessment of Ketosis                                      | Assessment of QOL                                                                                                                                                                                                                                                                 |
|--------------------------|--------------------------------|--------------------------------------------------------------------------------------------------------------------------------------------------------------------------------------------------------------------------------------------------------------------------------------------------------------------------------------------------------------------------------------------|-------------------------------------------------|--------|-----------------------|-----------------------------------------------------------------------------------------------------------------------------------------------------------------------------------------------------|-----------------------------------------------------------------------------------------------------------------------------------------------------------------------------------------------------------------------------------------------------|--------------------------------------------------------------------------|-----------------|------------------------------------------------------------|-----------------------------------------------------------------------------------------------------------------------------------------------------------------------------------------------------------------------------------------------------------------------------------|
| <i>Cancer</i>            |                                |                                                                                                                                                                                                                                                                                                                                                                                            |                                                 |        |                       |                                                                                                                                                                                                     |                                                                                                                                                                                                                                                     |                                                                          |                 |                                                            |                                                                                                                                                                                                                                                                                   |
| Augustus, 2021 [39]      | Trinidad and Tobago (Trinidad) | Stage 2 and 3 cancer patients (breast (65%), prostate (44%), colon/rectal (17%), cervical (13%), and lung (6%)) diagnosed with cancer >1 year, >18 years, currently receiving chemotherapy or radiation treatment, nonvegetarian, consuming a CHO-based diet (>40%), recruited from an outpatient private clinic<br>I: n = 20; 16 completed the trial<br>C: n = 20; 20 completed the trial | mean(SD):<br>I: 49.80 ± 6.72<br>C: 51.80 ± 4.18 | NR     | 16 weeks              | MKD: 7-day cyclic altered KD menu developed to avoid repetition and lack of interest in the meals (≈10% CHO (50g), 15% Protein (75g), 75% Fat (167g) providing 2,000 Kcal); main source of Fat: MCT | Standard traditional diet: usual diet with minor alterations being made to ensure that daily energy and nutrient requirements are met                                                                                                               | Not specified by study protocol                                          | None            | Urinary ketones: dip stick test and urine analyzer         | EORTC QLQ-C30 questionnaire: comprising 9 multi-item scales (5 functional scales: cognitive, physical, role, emotional, social; 3 scales to evaluate symptoms: pain, fatigue, nausea, vomiting; an overall global health and QOL scale), and several single item symptom measures |
| Cohen, 2018 [36]         | Birmingham (USA)               | Women with ovarian or endometrial cancer, BMI ≥18.5 kg/m <sup>2</sup> , ≥19 years, without medical condition affecting body weight and not attempting diet modification, recruited from a gynecologic oncology clinic and treatment centers<br><br>I: n = 37; 25 completed the trial<br>C: n = 36; 20 completed the trial                                                                  | I: 61.5 ± 8.5<br>C: 58.6 ± 11.7                 | 0%     | 12 weeks              | KD: 5% CHO (≤20g); 25% Protein (≤100g); 70% Fat (≤125g)                                                                                                                                             | ACS diet: based on recommendations from the American Cancer Society and the Academy of Nutrition and Dietetics including increased intake of fiber-rich fruits, vegetables, whole grains, as well as lean meats and small amounts of healthful fats | Neither group was instructed to alter total energy intake                | None            | Serum BHB: SIRRUS analyzer<br>Urinary ketones: strips      | SF-12: a score from 0 to 100, with higher scores indicative of better functional status (PCS and MCS)                                                                                                                                                                             |
| Khodabakhshi, 2020 [43]  | Tehran (Iran)                  | 80 women with locally advanced or metastatic breast cancer receiving chemotherapy for at least 12 weeks<br>I: n=40; 30 completed the trial (83.3% locally advanced; 16.7% metastatic)<br>C: n=40; 30 completed the trial (63.3% locally advanced; 36.7% metastatic)                                                                                                                        | Range: 18-70<br>I: 44.8 ± 8.4<br>C: 45.2 ± 15.0 | 0%     | 12 weeks              | 6% CHO, 19% Protein, 20% MCT, 55% Fat                                                                                                                                                               | 55% CHO, 15% Protein, 30% Fat                                                                                                                                                                                                                       | Both diets calculated to be eucaloric using the Mifflin-St. Jeor formula | None            | Blood BHB: home kit                                        | EORTC QLQ-C30 and EORTC QLQ-BR23 questionnaires developed by the European Organization for Research and Treatment of Cancer                                                                                                                                                       |
| Martin-McGill, 2020 [42] | United Kingdom                 | 12 patients (≥16 years) diagnosed with glioblastoma within the last 4 months (WHO grade IV) planning to go temozolomide chemotherapy and radiotherapy<br>MKD: n= 6; 1 completed 12 weeks; 1 completed 12 months                                                                                                                                                                            | Median age: 57y<br>Range: 44-66y                | 66.60% | 12 weeks<br>12 months | I1: MKD: 5% CHO, 80% Fat, 15% Protein<br>I2: MCTKD: 10% CHO, 75% Fat (30% from MCT nutrition product), 15% Protein                                                                                  | None                                                                                                                                                                                                                                                | Not specified by study protocol                                          | None            | Urinary ketones: dip stick test<br>Blood ketones: home kit | EORTC QLQ C30 questionnaire<br>BN20 questionnaire                                                                                                                                                                                                                                 |

|                                                          |                        |                                                                                                                                                                                                                                                                                                                                                        |                                                                                                                                                                                     |                                                            |                                       |                                                                                                                                                                                                                                                                                     |                                                                                                                                                                                                                                                                                                                    |                                                |                                                                              |                                     |                                                                                                                                                                            |  |
|----------------------------------------------------------|------------------------|--------------------------------------------------------------------------------------------------------------------------------------------------------------------------------------------------------------------------------------------------------------------------------------------------------------------------------------------------------|-------------------------------------------------------------------------------------------------------------------------------------------------------------------------------------|------------------------------------------------------------|---------------------------------------|-------------------------------------------------------------------------------------------------------------------------------------------------------------------------------------------------------------------------------------------------------------------------------------|--------------------------------------------------------------------------------------------------------------------------------------------------------------------------------------------------------------------------------------------------------------------------------------------------------------------|------------------------------------------------|------------------------------------------------------------------------------|-------------------------------------|----------------------------------------------------------------------------------------------------------------------------------------------------------------------------|--|
| MCTKD: n= 6; 3 completed 12 weeks; 2 completed 12 months |                        |                                                                                                                                                                                                                                                                                                                                                        |                                                                                                                                                                                     |                                                            |                                       |                                                                                                                                                                                                                                                                                     |                                                                                                                                                                                                                                                                                                                    |                                                |                                                                              |                                     |                                                                                                                                                                            |  |
| Neurological disorders                                   |                        |                                                                                                                                                                                                                                                                                                                                                        |                                                                                                                                                                                     |                                                            |                                       |                                                                                                                                                                                                                                                                                     |                                                                                                                                                                                                                                                                                                                    |                                                |                                                                              |                                     |                                                                                                                                                                            |  |
| Lee, 2020 [37]                                           | Iowa (USA)             | 15 patients with relapsing remitting multiple sclerosis or progressive relapsing-remitting multiple sclerosis with an expanded disability status score≥ 4.5<br>KD: n= 5; 4 analyzed (1: insufficient data)<br>MPD: n= 6<br>Usual diet: n= 4                                                                                                            | Total: Range: 36-63<br>Mean: 51.9 ± 9.5<br><br>KD: 51.8 ± 11.8<br>MPD: 50.3 ± 9.5<br>C: 54.5 ± 11.8                                                                                 | 50%                                                        | 12 weeks                              | MCT-based KD: ketogenic version of the modified Paleolithic diet with additional requirements (no starchy vegetables or fruits; reduce vegetable consumption to 6 servings daily; increase fat intake with supplemental MCTs to achieve a daily goal of 70% of total Kcal from fat) | MPD: Modified Paleolithic diet: 9 daily recommended servings of vegetables comprised of leafy green vegetables, sulfur rich vegetables, and deeply colored fruits and vegetables; encourages plant and animal protein, seaweed, nutritional yeast, nondairy milks; excludes gluten-containing grains, eggs, casein | Not specified by study protocol                | Pre-study vitamins, supplements, and/or medications                          | Plasma BHB: NR                      | Multiple Sclerosis Quality of Life-54: validated 54-item measure of physical- and mental health-related QOL, composed of 12 subscales, higher scores indicating better QOL |  |
|                                                          |                        |                                                                                                                                                                                                                                                                                                                                                        |                                                                                                                                                                                     |                                                            |                                       |                                                                                                                                                                                                                                                                                     | C: Usual diet                                                                                                                                                                                                                                                                                                      |                                                |                                                                              |                                     |                                                                                                                                                                            |  |
| Philips, 2021 [44]                                       | Hamilton (New Zealand) | 26 patients with Alzheimer diseases (dementia severity rating scale score <19), BMI> 18.5 Kg/m2, and a cohabiting trial partner willing to partake<br><b>Phase 1</b><br>KD: n=13; 11 completed the phase<br>Usual diet: n=13; 13 completed the phase<br><b>Phase 2</b><br>KD: n=13; 10 completed the phase<br>Usual diet: n=13; 13 completed the phase | <b>Total:</b><br>Range: 57-79<br>Mean: 69.8 ± 6.0<br><b>KD &gt; Usual diet</b><br>Range: 57-77<br>Mean: 68.0 ± 5.4<br><b>Usual diet &gt; KD</b><br>Range: 61-79<br>Mean: 71.7 ± 6.2 | Total: 62%<br>KD > Usual diet: 77%<br>Usual diet > KD: 46% | 12 weeks: I or C<br>10 weeks: washout | 58% Fat (26% SFA, 32% non-saturated), 29% Protein, 7% Fiber, 6% net CHO by weight                                                                                                                                                                                                   | Usual diet: optional low-fat recipes in accordance with New Zealand healthy-eating guidelines; 11% Fat (3% SFA, 8% non-saturated), 19% Protein, 8% Fiber, 62% net CHO by weight                                                                                                                                    | Not specified by study protocol                | Daily multivitamin                                                           | Serum BHB: ketone blood monitor     | QOL-AD administered to the trial partner: 13 items, scores between 13-52, with higher numbers indicating better QOL                                                        |  |
| Obesity and T2DM                                         |                        |                                                                                                                                                                                                                                                                                                                                                        |                                                                                                                                                                                     |                                                            |                                       |                                                                                                                                                                                                                                                                                     |                                                                                                                                                                                                                                                                                                                    |                                                |                                                                              |                                     |                                                                                                                                                                            |  |
| Brinkworth, 2016 [40]                                    | Adelaide (Australia)   | Adults with T2DM (HbA1c ≥7.0% or taking a diabetes medication), overweight and obese (BMI: 26-45 kg/m2), recruited via a public advertisement<br><br>I: n = 58; 41 completed the trial;                                                                                                                                                                | Range: 35-68<br>I (n = 58): 58 ± 72<br>C (n = 57): 58 ± 7                                                                                                                           | I: 64%<br>C: 51%                                           | 12 months                             | Energy-restricted very-low CHO, high-fat diet: 14% CHO (<50g); 28% Protein, 58% Fat (35% MUFA, 13% PUFA, <10% SFA)                                                                                                                                                                  | Energy-restricted high-CHO, low-fat diet: 53% CHO; 17% Protein; <30% Fat (15% MUFA, 9% PUFA, <10% SFA)                                                                                                                                                                                                             | I and C diets designed to be moderately energy | Multicomponent 60-minute, moderate-intensity, exercise program delivered and | Plasma BHB: D-3 Hydroxybutyrate kit | Diabetes-39 Questionnaire: assesses 5 dimensions of diabetes-related QOL: anxiety/worry (4 items); social burden (5 items); diabetes control (12                           |  |

|                     |                                    |                                                                                                                                                                                                                                                            |                                                                                          |                                                                                                     |          |                                                                                                                                               |                                                                                                                                                                      |                                                                        |      |                                                                                                                                                          |                                                                            |
|---------------------|------------------------------------|------------------------------------------------------------------------------------------------------------------------------------------------------------------------------------------------------------------------------------------------------------|------------------------------------------------------------------------------------------|-----------------------------------------------------------------------------------------------------|----------|-----------------------------------------------------------------------------------------------------------------------------------------------|----------------------------------------------------------------------------------------------------------------------------------------------------------------------|------------------------------------------------------------------------|------|----------------------------------------------------------------------------------------------------------------------------------------------------------|----------------------------------------------------------------------------|
|                     |                                    | 71% retention<br>C: n = 57; 37 completed the trial;<br>65% retention                                                                                                                                                                                       |                                                                                          |                                                                                                     |          |                                                                                                                                               | restricted (~30% restriction; 500-1000 Kcal/day deficit)                                                                                                             | supervised by exercise professionals on three nonconsecutive days/week |      | items); sexual functioning (3 items); energy and mobility (15 items) [each item is on a Likert scale: 1 (not affected at all) to 7 (extremely affected)] |                                                                            |
| Durrer, 2021 [41]   | Southern British Columbia (Canada) | Adults with T2DM diagnosed by a physician, using at least one glucose-lowering medication, obese (BMI ≥30 kgm2), recruited from community pharmacies<br><br>I: n = 98; n=78 completed the trial (98 ITT)<br>C: n = 90; n = 60 completed the trial (90 ITT) | I: 58 ± 11<br>C: 59 ± 8                                                                  | I: 44%<br>C: 43%                                                                                    | 12 weeks | Low-CHO energy-restricted commercial weight loss plan supplemented with whole foods (<50g CHO; 35–45 g Fat, 110–120 g Protein; 850-1100 Kcal) | Treatment-as-usual delivered by community pharmacists: information pamphlets on diet and lifestyle conforming with 2013 Diabetes Canada Clinical Practice Guidelines | Not specified by study protocol                                        | None | Capillary blood ketones: NR                                                                                                                              | SF-20                                                                      |
| Knee Osteoarthritis |                                    |                                                                                                                                                                                                                                                            |                                                                                          |                                                                                                     |          |                                                                                                                                               |                                                                                                                                                                      |                                                                        |      |                                                                                                                                                          |                                                                            |
| Strath, 2020 [38]   | Birmingham (USA)                   | 21 adults with medically diagnosed knee osteoarthritis<br><br>LCD: n= 8<br>LFD: n=6<br>C: n=7                                                                                                                                                              | Range: 65-75<br>LCD: mean 71.00 ± 3.12<br>LFD: mean 72.33 ± 1.97<br>C: mean 68.71 ± 7.11 | Randomized:<br>LCD: 60%<br>LFD: 75%<br>C: 80%<br><br>Completers:<br>LCD: 60%<br>LFD: 100%<br>C: 75% | 12 weeks | Kcal: unlimited; Fat: unlimited; CHO: 20g; Proteins: 100g                                                                                     | LFD: Kcal: 800-1200; Fat: 50-67g; CHO: unlimited; Proteins: 100g<br>C: Kcal: unlimited; Fat: unlimited; CHO: unlimited; Proteins: unlimited                          | No                                                                     | None | Not measured                                                                                                                                             | Knee Injury and Osteoarthritis Outcome Score quality of life questionnaire |

ACS: American Cancer Society; BHB: B-hydroxybutyrate; BMI: Body mass index; C: Control; CHO: Carbohydrate; EORTC QLQ-C30: European Organization for Research and Treatment of Cancer current core; GHS: Global Health Status; HbA1c: Glycated hemoglobin; I: Intervention; ITT: Intention to treat; KD: Ketogenic diet; LCD: Low-carbohydrate diet; LFD: Low fat diet; MCS: Mental component summary; MCT: Medium chain triglycerides; MCTKD: Medium chain triglyceride ketogenic diet; MKD: Modified ketogenic diet; MPD: Modified Paleolithic diet; MUFA: Monounsaturated fatty acids; NR: Not reported; PCS: Physical component summary; PUFA: Polyunsaturated fatty acids; QOL: Quality of life; QOL-AD: Quality of Life in Alzheimer's Disease; SD: Standard deviation; SF-12: Medical Outcomes Study Short Form-12 Health Survey; SF-20: Medical Outcomes Study Short Form-20 Health Survey; SFA: Saturated fatty acids; T2DM: Type 2 diabetes mellitus; WHO: World Health Organization.

Table S2. a. Results of included studies.

| First Author,<br>Year      | Baseline QOL                                                                                                                                                                                                                                                                                                                                                                                                                                                                                                                                                                                                                                                                                  | Endline QOL                                                                                                                                                                                                                                                                                                                                                                                                                                                                                                                                                                                                                                                                                                                                                                                                   | Conclusion                                                                                                                                                                                                                               |
|----------------------------|-----------------------------------------------------------------------------------------------------------------------------------------------------------------------------------------------------------------------------------------------------------------------------------------------------------------------------------------------------------------------------------------------------------------------------------------------------------------------------------------------------------------------------------------------------------------------------------------------------------------------------------------------------------------------------------------------|---------------------------------------------------------------------------------------------------------------------------------------------------------------------------------------------------------------------------------------------------------------------------------------------------------------------------------------------------------------------------------------------------------------------------------------------------------------------------------------------------------------------------------------------------------------------------------------------------------------------------------------------------------------------------------------------------------------------------------------------------------------------------------------------------------------|------------------------------------------------------------------------------------------------------------------------------------------------------------------------------------------------------------------------------------------|
| <i>Cancer</i>              |                                                                                                                                                                                                                                                                                                                                                                                                                                                                                                                                                                                                                                                                                               |                                                                                                                                                                                                                                                                                                                                                                                                                                                                                                                                                                                                                                                                                                                                                                                                               |                                                                                                                                                                                                                                          |
| Augustus, 2021<br>[39]     | I: 64.85 ± 7.9<br>C: 61.05 ± 13.81 (NS)                                                                                                                                                                                                                                                                                                                                                                                                                                                                                                                                                                                                                                                       | I: 36.850 ± 7.576<br>C: 60.450 ± 14.898 (Sig. difference over time; effect size: 0.268, medium)<br>Regression: inverse association between urinary ketones and QOL (b=-3.175, 95% CI=-5.723, -0.626); among the predictors: patients being in I group (b=-5.241, 95% CI=-10.373, -0.109)                                                                                                                                                                                                                                                                                                                                                                                                                                                                                                                      | Keto-adapted patients on a MKD had an improvement in self-reported QOL over time<br>KD may improve QOL of cancer patients (not inclusive of advanced stage cancer) compared with patients on a standard traditional diet                 |
| Cohen, 2018 [36]           | NR                                                                                                                                                                                                                                                                                                                                                                                                                                                                                                                                                                                                                                                                                            | PCS: I: 45; C: 40 (Sig)<br>MCS: I: 53; C: 53 (NS)<br>[Approximate numbers estimate from a figure in the article]<br>NS between-group difference in PCS after adjusting for baseline values, chemotherapy status, and fat<br>Sig. within-group increase in PCS in I group (11%); NS in C group<br>NS difference in the MCS between or within the diet groups<br>NS association between the PCS or MCS and serum BHB                                                                                                                                                                                                                                                                                                                                                                                            | Sig. between-group difference in adjusted PCS, NS between-group differences in MCS<br>In women with ovarian or endometrial cancer, a KD does not negatively affect quality of life and may improve physical function                     |
| Khodabakhshi,<br>2020 [43] | <b>EORTC QLQ-C30 Functioning (mean ± SD)</b><br><b>[Higher values indicate higher level of functioning and QOL]</b><br>Physical functioning: I: 89 ± 11; C: 76 ± 20 (Sig. difference between groups)<br>Role functioning: I: 86 ± 16; C: 79 ± 28<br>Cognitive functioning: I: 85 ± 16; C: 71 ± 28 (Sig. difference between groups)<br>Emotional functioning: I: 67 ± 21 ; C: 66 ± 21<br>Social functioning: I: 94 ± 17; C: 93 ± 17<br>Global quality of life: I: 68 ± 16; C: 65 ± 16                                                                                                                                                                                                          | <b>EORTC QLQ-C30 Functioning (mean ± SD)</b><br><b>[Higher values indicate higher level of functioning and QOL]</b><br>Physical functioning: I: 78 ± 19; C: 68 ± 20 (NS between groups; Sig. diff in I)<br>Role functioning: I: 75 ± 25; C: 66 ± 29 (NS between groups; Sig. diff in C)<br>Cognitive functioning: I: 75 ± 19; C: 72 ± 21 (NS between groups; Sig. diff in I)<br>Emotional functioning: I: 62 ± 23; C: 60 ± 21 (NS between groups)<br>Social functioning: I: 91 ± 17; C: 87 ± 17 (NS between groups; Sig. diff in C)<br>Global quality of life: I: 70 ± 20; C: 62 ± 20 (NS between groups)                                                                                                                                                                                                     | After adjusting baseline values and chemotherapy status, NS differences in all domains of QOL between I and C<br>KD diet combined to chemotherapy in patients with breast cancer does not bring additional benefit about QOL at 12 weeks |
|                            | <b>EORTC QLQ-C30 Symptoms (median (quartiles 25, 75))</b><br><b>[Higher values indicate a higher grade of symptoms]</b><br>Fatigue: I: 22(8–33); C: 33(11–44) (NS between groups)<br>Nausea & vomiting: I: 0(0–0); C: 0 (0–20) (NS between groups)<br>Pain: I: 16(0–50); C: 16(0–33) (NS between groups)<br>Reduction in appetite: I: 0(0–8); C: 0(0–33) (NS between groups)<br>Sleep difficulties: I: 16(0–33); C: 0(0–66) (NS between groups)<br>Dyspnea: I: 0(0–33); C: 0(0–33) (NS between groups)<br>Constipation: I: 0 (0–0); C: 0 (0–33) (NS between groups)<br>Diarrhea: I: 0 (0–0); C: 0 (0–0) (NS between groups)<br>Financial concerns: I: 0 (0–0); C: 0 (0–0) (NS between groups) | <b>EORTC QLQ-C30 Symptoms (median (quartiles 25, 75))</b><br><b>[Higher values indicate a higher grade of symptoms]</b><br>Fatigue: I: 33(19–55); C: 33(33–55) (NS between groups; Sig. diff in I; Sig. diff in C)<br>Nausea & Vomiting: I: 33(19–55); C: 33(33–55) (NS between groups; Sig. diff in I; Sig. diff in C)<br>Pain: I: 16(0–50); C: 33(16–50) (NS between groups)<br>Reduction in appetite: I: 33(0–33); C: 16(0–33) (NS between groups; Sig. diff in I)<br>Sleep difficulties: I: 0(0–41); C: 33(0–50) (NS between groups)<br>Dyspnea: I: 33(0–41); C: 16(0–33) (NS between groups)<br>Constipation: I: 0 (0–33); C: 0 (0–33) (NS between groups)<br>Diarrhea: I: 0 (0–33); C: 0 (0–0) (NS between groups)<br>Financial concerns: I: 0 (0–33); C: 33 (0–58) (NS between groups; Sig. diff in C) |                                                                                                                                                                                                                                          |
|                            | <b>EORTC QLQBR23 Functioning (median (quartiles 25, 75))</b><br><b>[Higher values indicate higher level of functioning and QOL]</b><br>Future perspective: I: 66 (33–100); C: 66 (33–66) (NS between groups)                                                                                                                                                                                                                                                                                                                                                                                                                                                                                  | <b>EORTC QLQBR23 Functioning (median (quartiles 25, 75))</b><br><b>[Higher values indicate higher level of functioning and QOL]</b><br>Future perspective: I: 66 (33–66); C: 33 (33–100) (NS between groups)                                                                                                                                                                                                                                                                                                                                                                                                                                                                                                                                                                                                  |                                                                                                                                                                                                                                          |
|                            | <b>EORTC QLQBR23 Symptoms (median (quartiles 25, 75))</b><br><b>[Higher values indicate a higher grade of symptoms]</b><br>Arms: I: 11 (0–36); C: 11 (0–22) (NS between groups)<br>Breast: I: 8 (0–33); C: 8 (0–25) (NS between groups)<br>Systemic therapy side effect: I: 9 (4–17); C: 14 (4–23) (NS between                                                                                                                                                                                                                                                                                                                                                                                | <b>EORTC QLQBR23 Symptoms (median (quartiles 25, 75))</b><br><b>[Higher values indicate a higher grade of symptoms]</b><br>Arm: I: 11 (0–36); C: 22 (0–33) (NS between groups)                                                                                                                                                                                                                                                                                                                                                                                                                                                                                                                                                                                                                                |                                                                                                                                                                                                                                          |

|                             |                                                                                                                                                                                                                                                                                                                                                                                                                                                                                                       |                                                                                                                                                                                                                                                                                                                                                                                                                                                                                                                                                          |                                                                                                                                                                                                                                                                                                                     |
|-----------------------------|-------------------------------------------------------------------------------------------------------------------------------------------------------------------------------------------------------------------------------------------------------------------------------------------------------------------------------------------------------------------------------------------------------------------------------------------------------------------------------------------------------|----------------------------------------------------------------------------------------------------------------------------------------------------------------------------------------------------------------------------------------------------------------------------------------------------------------------------------------------------------------------------------------------------------------------------------------------------------------------------------------------------------------------------------------------------------|---------------------------------------------------------------------------------------------------------------------------------------------------------------------------------------------------------------------------------------------------------------------------------------------------------------------|
|                             | groups)<br>Concerns over hair loss: I: 0; C: 0 (NS between groups)                                                                                                                                                                                                                                                                                                                                                                                                                                    | Breast: I: 8 (0–10); C: 8 (0–16) (NS between groups; Sig. diff in I)<br>Systemic therapy side effect: I: 42 (20–52); C: 42 (33–52) (NS between groups;<br>Sig. diff in I; Sig. diff in C)<br>Concerns over hair loss: I: 66 (33–100); C: 33 (33–100) (NS between groups;<br>Sig. diff in I; Sig. diff in C)                                                                                                                                                                                                                                              |                                                                                                                                                                                                                                                                                                                     |
| Martin-McGill,<br>2020 [42] | Little difference between GHS between patients who withdrew and<br>those who were retained, in either dietary group:<br>MCTKD: withdrew (n=3): 72.2 ± 20.7; retained (n=3): 75 ± 6.8<br>MKD: withdrew (n=5): 70 ± 13.8; retained (n=1): 80 ± 0                                                                                                                                                                                                                                                        | <b>Week 6:</b> GHS of those who withdrew fell below the brain cancer reference<br>value in both the MCTKD and MKD groups (withdrew: MCTKD 41.7±0 [n =<br>1]; MKD 50 ± 0 [n = 2])<br><b>Week 6 onward:</b> GHS improved for the patient following MKD and reduced<br>for patients following MCTKD. In both groups, GHS remained above the<br>brain cancer reference value: retained at month 12: MCTKD: 66.7±8.4 [n=2];<br>100±0 [n=1]                                                                                                                    | GHS was below the brain cancer reference value<br>for patients at week 6 of the study<br>For retained patients at 12 months, GHS reduced<br>within the MCTKD group and improved in the<br>MKD group                                                                                                                 |
| Neurological disorders      |                                                                                                                                                                                                                                                                                                                                                                                                                                                                                                       |                                                                                                                                                                                                                                                                                                                                                                                                                                                                                                                                                          |                                                                                                                                                                                                                                                                                                                     |
| Lee, 2020 [37]              | <b>Mental Health</b><br>KD: 61.5 ±25.5<br>MPD: 53.7±23.3<br>C: 66.3± 8.2                                                                                                                                                                                                                                                                                                                                                                                                                              | <b>Mental Health (NS difference between groups)</b><br>KD: ≈67 (data from graph)<br>MPD: 67.0± 24.7<br>C: 54.1± 21.1                                                                                                                                                                                                                                                                                                                                                                                                                                     | NS differences in mental health and physical health<br>QOL scores among groups<br>Suggested clinically sig. improvements in mental<br>health and physical health QOL with Modified<br>Paleolithic diet (change >5)<br>Suggested clinically sig. decline in mental health<br>and physical health QOL with usual diet |
|                             | <b>Physical Health</b><br>KD: 40.4 ±6.2<br>MPD: 32.8±10.8 (sig. lower than usual diet)<br>C: 46.4 ±11.0                                                                                                                                                                                                                                                                                                                                                                                               | <b>Physical Health (NS difference between groups)</b><br>KD: ≈40 (data from graph)<br>MPD: 47 ±18<br>C: 40.7 ±14.4                                                                                                                                                                                                                                                                                                                                                                                                                                       |                                                                                                                                                                                                                                                                                                                     |
| Philips, 2021 [44]          | <b>Phase 1:</b> KD > Usual diet: 33.8 ± 5.6; Usual diet > KD: 33.9 ± 5.8<br><b>Phase 2:</b> KD > Usual diet: 34.1 ± 8.5; Usual diet > KD: 31.8 ± 7.3<br><b>Total:</b> KD > Usual diet: 32.8 ± 6.4; Usual diet > KD: 34.0 ± 7.1                                                                                                                                                                                                                                                                        | <b>Phase 1:</b> KD > Usual diet: +2.86 ± 4.64; Usual diet > KD: -1.15 ± 5.41<br><b>Phase 2:</b> KD > Usual diet: +0.31 ± 3.68; Usual diet > KD: +3.03 ± 7.52<br><b>Total:</b> KD > Usual diet: +2.95 ± 6.12; Usual diet > KD: -0.42 ± 4.60<br>Sig. treatment effect (+3.37 ± 6.86)                                                                                                                                                                                                                                                                       | Patients on KD had improved QOL as compared to<br>those on usual diet<br>High rates of retention and adherence are<br>achievable in applying a 12-week MKD to patients<br>with Alzheimer's disease and adverse effects are<br>mild                                                                                  |
|                             | <b>Patients who remained on protocol for both treatment periods and<br/>achieved sustained physiological ketosis in first treatment period:</b><br>KD > Usual diet: 35.4 ± 5.0; Usual diet > KD: 32.1 ± 5.8<br><b>Patients who remained on protocol for both treatment periods and<br/>achieved sustained physiological ketosis in second treatment period:</b><br>KD > Usual diet: 36.9 ± 7.5; Usual diet > KD: 30.3 ± 8.2<br><b>Total:</b> KD > Usual diet: 33.1 ± 6.9; Usual diet > KD: 34.8 ± 7.1 | <b>Patients who remained on protocol for both treatment periods and<br/>achieved sustained physiological ketosis in first treatment period:</b> KD ><br>Usual diet: +3.50 ± 4.38; Usual diet > KD: -0.63 ± 6.93<br><b>Patients who remained on protocol for both treatment periods and<br/>achieved sustained physiological ketosis in first treatment period:</b> KD ><br>Usual diet: -0.70 ± 3.59; Usual diet > KD: +3.75 ± 9.56<br><b>Total:</b> KD > Usual diet: +3.61 ± 6.91; Usual diet > KD: -0.67 ± 5.16<br>Sig. treatment effect (+4.28 ± 7.27) |                                                                                                                                                                                                                                                                                                                     |
| Obesity and T2DM            |                                                                                                                                                                                                                                                                                                                                                                                                                                                                                                       |                                                                                                                                                                                                                                                                                                                                                                                                                                                                                                                                                          |                                                                                                                                                                                                                                                                                                                     |
| Brinkworth, 2016<br>[40]    | Anxiety and Worry<br>I: 31.8 ± 2.9<br>C: 25.9 ± 2.9<br>Social Burden<br>I: 9.3 ± 1.7<br>C: 7.7 ± 1.7<br>Sexual Functioning<br>I: 24.3 ± 4.0<br>C: 22.8 ± 4.1<br>Energy and Mobility<br>I: 18.1 ± 2.1<br>C: 17.5 ± 2.1                                                                                                                                                                                                                                                                                 | Anxiety and Worry<br>I: 31.5 ± 3.8<br>C: 22.1 ± 3.9<br>Social Burden<br>I: 10.8 ± 2.3<br>C: 8.1 ± 2.3<br>Sexual Functioning<br>I: 19.6 ± 3.5<br>C: 11.9 ± 3.5<br>Energy and Mobility<br>I: 19.3 ± 2.3<br>C: 12.5 ± 2.3                                                                                                                                                                                                                                                                                                                                   | In overweight and obese adults with T2DM, both<br>high and low CHO diets achieved comparable<br>improvements in QOL                                                                                                                                                                                                 |
|                             | Physical Functioning<br>I: 70.1 ± 28.8                                                                                                                                                                                                                                                                                                                                                                                                                                                                | Adjusted means (*a precise p-value could not be obtained)<br>Physical Functioning: Treatment effect: 0.7 (-7.7, 9.9)*                                                                                                                                                                                                                                                                                                                                                                                                                                    |                                                                                                                                                                                                                                                                                                                     |
| Durrer, 2021 [41]           |                                                                                                                                                                                                                                                                                                                                                                                                                                                                                                       |                                                                                                                                                                                                                                                                                                                                                                                                                                                                                                                                                          | In obese patients with T2DM, there sig.<br>improvement in role functioning, mental health,                                                                                                                                                                                                                          |

|                            |                                                                                                                                                                                                                                                                                             |                                                                                                                                                                                                                                                                                                                                                                                                                        |                                                                                                                                                                                |
|----------------------------|---------------------------------------------------------------------------------------------------------------------------------------------------------------------------------------------------------------------------------------------------------------------------------------------|------------------------------------------------------------------------------------------------------------------------------------------------------------------------------------------------------------------------------------------------------------------------------------------------------------------------------------------------------------------------------------------------------------------------|--------------------------------------------------------------------------------------------------------------------------------------------------------------------------------|
|                            | C: 69.6 ± 28.2<br>Role Functioning<br>I: 71.9 ± 39.1<br>C: 71.7 ± 40.7<br>Social Functioning<br>I: 81.3 ± 27.9<br>C: 84.4 ± 25.4<br>Mental Health<br>I: 76.7 ± 16.6<br>C: 74.4 ± 16.3<br>Health Perceptions<br>I: 52.8 ± 24.4<br>C: 49.2 ± 23.6<br>Pain<br>I: 41.6 ± 27.0<br>C: 47.6 ± 21.3 | I: 72.5<br>C: 71.8<br>Role Functioning: Treatment effect: 13.6 (2.4, 26.3)*<br>I: 88.6<br>C: 75.0<br>Social Functioning: Treatment effect: 6.1 (-2, 14.3)*<br>I: 93.8<br>C: 87.8<br>Mental Health: Treatment effect: 6.9 (1.9, 12.7)*<br>I: 83.4<br>C: 76.5<br>Health Perceptions: Treatment effect: 19.2 (13.2, 25.4) (NS)<br>I: 70.6<br>C: 51.4<br>Pain: Treatment effect: -7.5 (-17.2, -0.1)*<br>I: 28.5<br>C: 36.0 | health perceptions, and pain with low-CHO<br>energy-restricted diet compared with usual diet                                                                                   |
| <i>Knee Osteoarthritis</i> |                                                                                                                                                                                                                                                                                             |                                                                                                                                                                                                                                                                                                                                                                                                                        |                                                                                                                                                                                |
| Strath, 2020 [38]          | LCD: 3.28 ± 0.604<br>LFD: 2.91 ± 0.785<br>C: 3.67 ± 0.718                                                                                                                                                                                                                                   | LCD: 2.75 ± 0.627 (sig. change from baseline to end line)<br>LFD: 2.08 ± 0.954 (NS change from baseline to end line)<br>C: 3.26 ± 0.759 (sig. change from baseline to end line)<br>NS time*diet interaction and NS differences in LCD and LFD group after<br>post hoc analysis                                                                                                                                         | In older adults with knee osteoarthritis following<br>an LCD for 12 weeks, the QOL sig. improved. NS<br>differences in LCD and LFD group were noted after<br>post hoc analysis |

Table S2. b. Results of included studies.

| First Author,<br>Year         | Compliance                                                                                                                                                                                                                    | Ketosis                                                                                                                | Adverse events/Side effects                                                                                                                                                                                                                                                                                                                                                                                                                                                                                                        | Attrition                                                                                                                                                                                                                                                                                                                                                                                                             |
|-------------------------------|-------------------------------------------------------------------------------------------------------------------------------------------------------------------------------------------------------------------------------|------------------------------------------------------------------------------------------------------------------------|------------------------------------------------------------------------------------------------------------------------------------------------------------------------------------------------------------------------------------------------------------------------------------------------------------------------------------------------------------------------------------------------------------------------------------------------------------------------------------------------------------------------------------|-----------------------------------------------------------------------------------------------------------------------------------------------------------------------------------------------------------------------------------------------------------------------------------------------------------------------------------------------------------------------------------------------------------------------|
| <i>Cancer</i>                 |                                                                                                                                                                                                                               |                                                                                                                        |                                                                                                                                                                                                                                                                                                                                                                                                                                                                                                                                    |                                                                                                                                                                                                                                                                                                                                                                                                                       |
| Augustus, 2021<br>[39]        | Three-day food diaries (2 weekdays and 1 weekend) obtained at the weeks 6 and 12 to ensure subjects were adhering to diet                                                                                                     | Sig. rise in urinary ketones in I group compared with C group                                                          | I: side-effects related to keto-adaptation (first 2-6 weeks; sig. reduced 6 weeks post treatment): fatigue, dizziness, reduced energy<br>C: headaches/migraines<br>Unable to determine whether reduced energy or fatigue are attributed to I or by the natural progression of the disease                                                                                                                                                                                                                                          | I: 2% [n=4: nausea and vomiting related to I affecting subjects' palatability (n=2); inability to complete testing at all follow-up times (n=1); mortality not related to medical treatment nor I (n=1)]<br>C: 0%                                                                                                                                                                                                     |
| Cohen, 2018 [36]              | Weekly phone calls and/or e-mails from the study dietitian for the remainder of the intervention to review food records and discuss strategies to enhance participants' adherence and enjoyment of their assigned diets       | BHB (mmol/L)<br>I: Week 0: 0.36 ± 0.15; Week 12: 0.91 ± 0.16 (Sig)<br>C: Week 0: 0.20 ± 0.02; Week 12: 0.25 ± 0.04     | NR                                                                                                                                                                                                                                                                                                                                                                                                                                                                                                                                 | I: n=6 did not enroll due to scheduling conflicts; n=6 withdrew: scheduling conflicts (n=1); no longer wishing to comply with dietary requirements (n=1); cancer recurrence n=3; death (n=1)<br>C: n=10 did not enroll due to scheduling conflicts; n=6 withdrew: scheduling conflicts (n=3); no longer wishing to comply with dietary requirements (n=2), death (n=1)                                                |
| Khodabakhshi, 2020 [43]       | I: BHB every 3 weeks and dietary intake at baseline and endline<br>Serum ketones >0.5 at week 12: 66.7%<br>CHO <50g: 96%; <10% Kcal from CHO: 79.2%                                                                           | Serum ketones > 0.5 mmol/L: 66.7%<br>Sig. increase in serum ketones in I group (0.007 ± 0.026 to 0.923 ± 0.699 mmol/l) | None reported in both groups                                                                                                                                                                                                                                                                                                                                                                                                                                                                                                       | I: n=10 withdrew after beginning assigned diet (2 nausea and hypoglycemia; 3 weakness and hunger; 1 refusal to participate; 2 unable to stick to diet; 2 lack of energy and oiliness of the diet)<br>C: n=3 patients withdrew before beginning assigned diet; n=7 withdrew after beginning assigned diet (5 frequent blood sampling; 1 surgery; 1 diabetes)                                                           |
| Martin-McGill, 2020 [42]      | Assessment of diet adherence: food diaries<br>Assessment of ketosis: urinary ketones and blood ketones (monitored at home)<br>During the first 6 weeks, 79.7% of MCTKD (n=3) and 79.3% of MKD (N=3): blood ketones ≥4 mmol/L. | Blood ketones: ≥ 4mmol/L                                                                                               | 5 adverse events: hypokalemia (n=2), hyponatremia (n=1), hypocalcaemia (n=1), partial seizure (n=1)<br>3 serious adverse events: post-operative wound infection (n=1) seizure (n=1), back pain (n=1) [none related to the dietary intervention]<br><b>Gastrointestinal side effects:</b><br>First 6 weeks: MCT KD group : diarrhoea (n=1), nausea (n=1), vomiting (n=1), dyspepsia (n=1); MKD group: vomiting (n=1) and a dry mouth (n=1).<br>At month 6: MCTKD: diarrhoea, dyspepsia, constipation (n=1); MKD: constipation (n=1) | MCTKD: 6 randomized: 1 withdrew prior to commencing (changed mind); 5 commenced; 2 withdrew (1 dietary burden; 1 recruited to another trial); 3 completed 12 weeks; 1 withdrew (GI intolerance); 2 completed 12 months<br>MKD: 6 randomized: 1 withdrew prior to commencing (non-related SAE); 5 commenced; 4 withdrew (2 dietary burden; 1 tumor progression; 1 nausea); 1 completed 12 weeks; 1 completed 12 months |
| <i>Neurological disorders</i> |                                                                                                                                                                                                                               |                                                                                                                        |                                                                                                                                                                                                                                                                                                                                                                                                                                                                                                                                    |                                                                                                                                                                                                                                                                                                                                                                                                                       |
| Lee, 2020 [37]                | NS between-group difference in mean plasma BHB at baseline<br>At 12 weeks, KD group maintained nutritional ketosis and sig. higher BHB (0.78 ± 0.46 mmol/L; sig. higher than MPD and C)                                       | Plasma BHB: ≥0.50 mmol/L                                                                                               | None reported                                                                                                                                                                                                                                                                                                                                                                                                                                                                                                                      | n=1 in KD not analyzed because of large amount of missing data                                                                                                                                                                                                                                                                                                                                                        |
| <b>KD</b>                     |                                                                                                                                                                                                                               |                                                                                                                        |                                                                                                                                                                                                                                                                                                                                                                                                                                                                                                                                    |                                                                                                                                                                                                                                                                                                                                                                                                                       |
| Philips, 2021 [44]            | Assessment of diet adherence: 3-day (2 weekdays, 1 weekend day) food record<br>Assessment of ketosis: Bedtime ketone monitoring; 85.7% (18/21) of patients who completed KD achieved sustained physiological ketosis          | Serum BHB ≥ 0.6 mmol/L                                                                                                 | Increased irritability: (19%); Increased fatigue: (23%); Sugar craving: (8%); Insomnia: (4%); Muscle cramp: (12%); Constipation: (4%); Feeling light headed: (15%); Increased back pain: (4%); Excessive hunger: (8%); Excessive thirst: (4%); Diarrhea: (4%); Palpitations: (4%)<br><b>Usual Diet:</b><br>Increased irritability: (35%); Increased fatigue: (27%); Sugar craving:                                                                                                                                                 | Phase 1<br>KD: n=13; 2 withdrew (1 declined to remove daily sugar; 1 excess coconut oil and diarrhea); 11 completed the phase<br>C: n=13; 13 completed the phase<br>Phase 2<br>KD: n=13; 10 completed the phase; 3 withdrew (1 declined to remove daily sugar; 1 declined to remove daily beer; 1                                                                                                                     |

|                            |                                                                                                                                                                                                                                                                                                                                                                                                                     |                                                                                               |                                                                                                                                                                                                                                                                                                                                                                                                                                                                                                                                                                                                                                                                                       |                                                                                                                                                                                                                                                                                                                                                                            |
|----------------------------|---------------------------------------------------------------------------------------------------------------------------------------------------------------------------------------------------------------------------------------------------------------------------------------------------------------------------------------------------------------------------------------------------------------------|-----------------------------------------------------------------------------------------------|---------------------------------------------------------------------------------------------------------------------------------------------------------------------------------------------------------------------------------------------------------------------------------------------------------------------------------------------------------------------------------------------------------------------------------------------------------------------------------------------------------------------------------------------------------------------------------------------------------------------------------------------------------------------------------------|----------------------------------------------------------------------------------------------------------------------------------------------------------------------------------------------------------------------------------------------------------------------------------------------------------------------------------------------------------------------------|
|                            |                                                                                                                                                                                                                                                                                                                                                                                                                     |                                                                                               | (23%); Insomnia: (19%); Muscle cramp: (4%); Constipation: (15%); Feeling light headed: (12%); Increased back pain: (12%); Nausea: (8%); Headache: (12%); Heart burn: (8%); Palpitations: (4%); Urinary calculus: (4%); Psychotic episode: (4%)                                                                                                                                                                                                                                                                                                                                                                                                                                        | declined most of the food)<br>C: n=13; 13 completed the phase                                                                                                                                                                                                                                                                                                              |
| <i>Obesity and T2DM</i>    |                                                                                                                                                                                                                                                                                                                                                                                                                     |                                                                                               |                                                                                                                                                                                                                                                                                                                                                                                                                                                                                                                                                                                                                                                                                       |                                                                                                                                                                                                                                                                                                                                                                            |
| Brinkworth, 2016 [40]      | Good compliance in both groups to prescribed diets throughout the study:<br>CHO: I: 54.0-74.0 g/d (13.4–16.6% energy); C: 202.0-217.6 g/d (50.5–49.0%)<br>Protein: I: 103.1-106.1 g/d (27.0–25.6%); C: 72.1-78.5 g/d (18.9–18.4%)<br>Fat: I: 95.9-101.5 g/d (54.4–52.5%); C: 42.4-51.8 g/d (24.1-26.1%)<br>SFA: I: 9.8–11.0%; C: 7.2–8.5%<br>MUFA: I: 30.7–28.8%; C: 11.4–12.0%<br>PUFA: I: 12.4–11.1%; C: 4.1–4.2% | Plasma BHB increased more with I after 4 weeks and remained higher over 52 weeks than C (sig) | Musculoskeletal ailments: I: n = 8; C: n = 13 [Associated with exercise training: I: n = 6; C: n = 8]<br>Gastrointestinal disorders (constipation and diverticulitis): I: n = 2; C: n = 1<br>Esophageal ulcers with Helicobacter pylori infection: C: n = 1<br>Nonhospitalized hypoglycemia incident: I: n = 1<br>Hospitalization for arrhythmia with suspected heart failure: C: n = 1<br>Prostate cancer and melanoma: I: n = 1; C: n = 1<br>Nonstudy related workplace injuries: I: n = 3; C: n = 1<br>Hospitalization for pneumonia: I: n = 1<br>Malignant hyperthermia: I: n = 1<br>Anaphylactic reaction to the influenza vaccine: C: n = 1<br>Motor vehicle accident: C: n = 1 | I: n=17 [Lost to follow-up (n=6); Time constraints (n=4); Work commitments (n=3); Unable to comply with diet (n=1); Personal reasons (n=2); Health issue external to study (n=1)]<br><br>C: n=21 [Lost to follow-up (n=4); Time constraints (n=1); Work commitments (n=3); Unable to comply with diet (n=5); Personal reasons (n=5); Health issue external to study (n=3)] |
| Durrer, 2021 [41]          | I: non adherence: 2.12% (2/94)<br>Assessment of food intake: fasting blood sample and a 3-day diet                                                                                                                                                                                                                                                                                                                  | NR                                                                                            | I: n=4: mild hypoglycemic events (n=2 when participants were reluctant to reduce insulin dosages by the recommended amount; resolved with recommended medication); Hypoglycemic symptoms (n=1 might be due to waiting too long between meals; resolved after solving this issue); Cardiac event (n=1 occurred 3 weeks into the study; deemed not related to I by data and safety monitoring board)<br>C: n=0                                                                                                                                                                                                                                                                          | Drop-out prior to commencing the trial:<br>I: n=4 (1 ineligible; 3 lost contact)<br>C: n=15 (2 ineligible; 1 moved away; 12 lost contact)<br><br>Attrition<br>I: n=16 (2 family issues; 2 could not adhere; 2 unrelated health issues; 1 travel; 9 lost contact)<br>C: n=15 (15 lost contact)                                                                              |
| <i>Knee Osteoarthritis</i> |                                                                                                                                                                                                                                                                                                                                                                                                                     |                                                                                               |                                                                                                                                                                                                                                                                                                                                                                                                                                                                                                                                                                                                                                                                                       |                                                                                                                                                                                                                                                                                                                                                                            |
| Strath, 2020 [38]          | Food journal to log meals each week (type of food, beverages, sauces, and added sugars/sweeteners and amounts consumed)<br>Adherence: verbally confirmed; food journals assessed by a dietician and the study administrator at each visit                                                                                                                                                                           | Not measured                                                                                  | NR                                                                                                                                                                                                                                                                                                                                                                                                                                                                                                                                                                                                                                                                                    | LFD: 1 lost to nonadherence<br>C: 2 failed to complete the study                                                                                                                                                                                                                                                                                                           |

BHB: B-hydroxybutyrate; C: Control; CHO: Carbohydrate; CI: Confidence interval; EORTC QLQ-C30: European Organization for Research and Treatment of Cancer current core; GHS: Global Health Status;; I: Intervention;; KD: Ketogenic diet; LCD: Low-carbohydrate diet; LFD: Low at diet; MCS: Mental component summary; MCT: Medium chain triglycerides; MCTKD: Medium chain triglyceride ketogenic diet; MKD: Modified ketogenic diet; MPD: Modified Paleolithic diet; MUFA: Monounsaturated fatty acids; NR: Not reported; ; NS: Not Significant; PCS: Physical component summary; PUFA: Polyunsaturated fatty acids; QOL: Quality of life; SD: Standard deviation; SFA: Saturated fatty acids; Sig: Significant; T2DM: Type 2 diabetes mellitus.
